# Supplementary material for: A label-free ultrasensitive electrochemical aptameric recognition system for protein assay based on hyperbranched rolling circle amplification
Source: Royal Society of Chemistry journal article supplement (doi:10.1039/c3cc46274a), 2013-01-01
Supplement: c3cc46274a.pdf [file c3cc46274a.pdf]

## Supporting Information

# Label-free Ultrasensitive Electrochemical Aptameric Recognition System for Protein Assay Based on Hyperbranched Rolling Circle Amplification

## Experimental Section

### Apparatus

All electrochemical measurements were carried out using CHI 660A electrochemical system (CH Instruments, Shanghai, China). Gold electrode (2 mm in diameter, CH Instruments, Shanghai, China) was used as the working electrode. Platinum wire and Ag/AgCl (saturated with KCl) were used as counter and reference electrodes, respectively.

### Reagents

All oligonucleotides designed in this research were synthesized by Sangon Inc. (Shanghai, China). Their sequences are shown below:

PDGF-BB Aptamer: 5'-C **CAGG CTAC GGCA CGTA GAGC ATCA CCAT GATC**  
**CTGG**-3'

CDNA: 5'-SH- **ATC ATGG TGAT GCTC TACG TG** -3'

Padlock Probe: 5'-P- **ATCA CCAT GAT TATCC TTTGG TTGAA ACTTC TTCCT**  
**TTCTT CA CGTA GAGC**-3'

HRCA Primer 1: 5'-TTCAA CCAAA GGATA-3'

HRCA Primer 2: 5'-ACTTC TTCCT TTCTT-3'

24 The 5' end of the padlock probe was phosphorylated while the italicized portions  
25 were designed to match with the italicized portions of CDNA. The underlined  
26 portions of aptamer probe are the specific binding sequences for platelet-derived  
27 growth factor (PDGF-BB) while the italicized portions could hybridize with the  
28 CDNA. In the padlock probe, the binding region for the HRCA primer 1 was shown  
29 in wavy line, and the region with the same sequence as the HRCA primer 2 was  
30 shown in underlined portions.

31 The deoxynucleotide solution mixture (dNTPs), the Escherichia coli DNA  
32 ligase(E. coli DNA ligase), Bst DNA polymerase large fragment and their  
33 corresponding buffer were obtained from Takara Biotechnology Co., Ltd. (Dalian,  
34 China). PDGF-BB was purchased from Boisynthesis LTD. (Beijing, China).  
35 Methylene blue (MB) was obtained from Dingguo Biochemical Reagents Company  
36 (Changsha, China). Tris(2-carboxyethyl) phosphine (TCEP) and 6-mercaptohexanol  
37 (MCH) were purchased from Sigma (St. Louis, MO) and used without further  
38 purification. Other chemicals were of analytical-reagent grade and used as received.  
39 Deionized water (Milli-Q, Millipore, resistance 18.2-M $\Omega$ ) was used throughout the  
40 experiments. DNA buffer solutions were prepared by dissolving DNA into 50 mmol/L  
41 Tris-HCl (pH 7.4) containing 150 mmol/L NaCl, 10mmol/L MgCl<sub>2</sub> and 10mmol/L  
42 KCl;. 50mmol/L PBS (pH=7.0) buffer containing 0.5mol/L KCl to perform  
43 differential pulse voltammetry (DPV) analysis; 0.01mol/L [Fe(CN)<sub>6</sub>]<sup>3-/4-</sup> solution  
44 containing 0.5mol/L KCl was prepared and used for electrochemical impedance  
45 measurement.

46

#### 47 **Fabrication of Biosensor**

48• The gold electrode (2 mm in diameter) was polished with aqueous slurries of  
49 1.0  $\mu\text{m}$ , 0.3  $\mu\text{m}$  and 0.05  $\mu\text{m}$   $\alpha\text{-Al}_2\text{O}_3$  powders on the microcloth, respectively, and  
50 rinsed with deionized water. Then, the gold electrode was electrochemically activated  
51 in 0.5 mol/L sulfuric acid by consecutive cyclic voltammetry (CV) (from  $-0.4\sim+1.6\text{V}$ )  
52 scanning for 5 min. Next, the cleaned gold electrode was immersed into 1  $\mu\text{mol/L}$   
53 CDNA solution for 120 min in the dark, and then passivated with 1 mmol/L MCH.  
54 The modified electrode was then immersed into the Tris-HCl buffer with 5  $\mu\text{mol/L}$   
55 aptamer and the electrode was held at 300 mV for 30 min to obtain the aptamer-DNA  
56 duplex biosensor, which was used for the following experiment. (Note: After each  
57 treatment, the electrode should be rinsed with the Tris-HCl buffer solution ( $\text{pH}=7.4$ )  
58 to eliminate the physical adsorption.)

#### 59 **Target detection procedures**

60 Then sensor was immersed into 150  $\mu\text{L}$  Tris-HCl buffer solution (containing  
61 different concentration of PDGF-BB, 50 nmol/L linear padlock probe, 6 U *E. coli*  
62 DNA ligase, and 0.05% BSA) for target-binding and ligation at  $37^\circ\text{C}$  for 60 min. And  
63 then, the HRCA reaction and label accumulation were carried out at  $63^\circ\text{C}$  for 60 min  
64 simultaneously in above solution, which including 1  $\mu\text{mol/L}$  primer 1, 1  $\mu\text{mol/L}$   
65 primer 2, 9.6 U Bst DNA polymerase, 0.6 mmol/L dNTP and  $4\times 10^{-5}$  mol/L MB.

66• The working electrode was then rinsed with deionized water thoroughly and  
67 then immersed into a detection cell for the electrochemical measurements. Differential

68 pulse voltammetry (DPV) has been chosen as scan mode, the scan was performed in  
69 the range of 0V~-0.5V. Impedance measurements were recorded between 0.1 MHz  
70 and 1 Hz at a sinusoidal voltage perturbation of 5 mV amplitude. A Randles  
71 equivalent circuit was used to fit the obtained impedance spectra.

72

73 **Fig.S1**

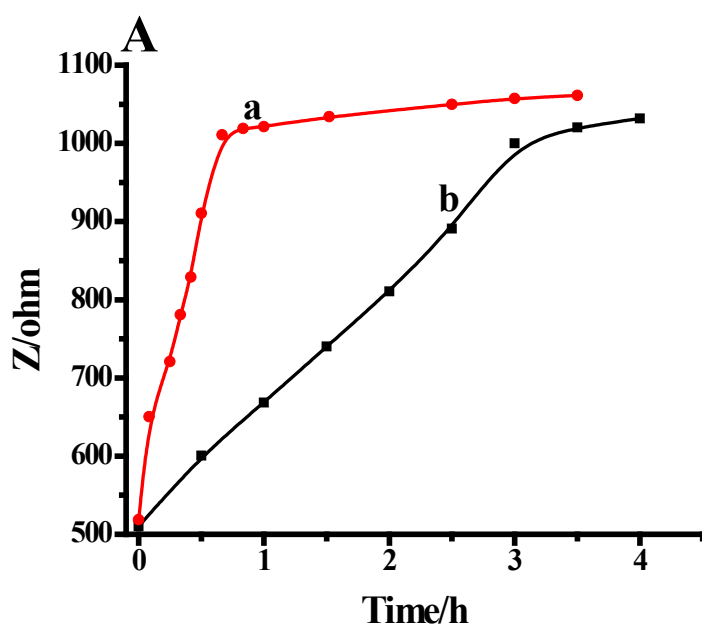

74

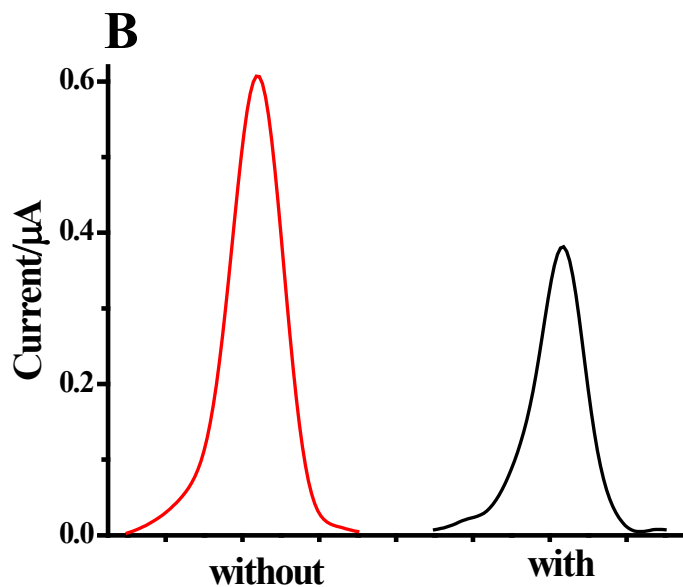

75

76 **Fig.S1** (A) Comparison of impedance value between positive potential enhanced  
77 hybridization method (a) and traditional hybridization method(b) (B) Background  
78 signal of the system with and without a positive potential (300 mV) held on the  
79 electrode.

80 **Fig.S2**

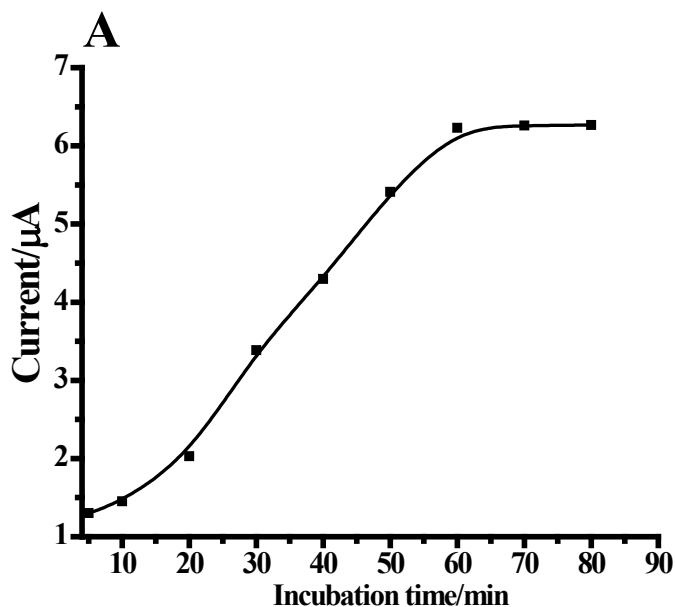

81

82

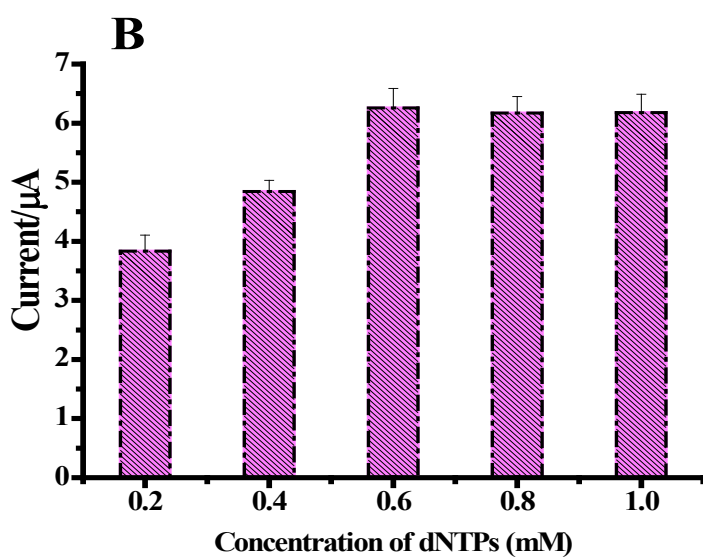

83

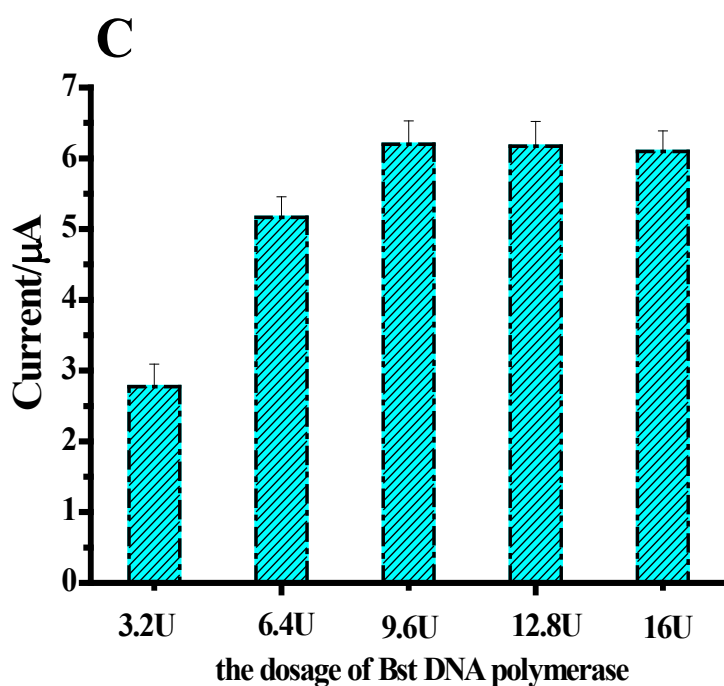

84

85 **Fig.S2** Optimization of HRCA experiment conditions: (A) Curve of electrochemical  
86 response at different incubation time. (B) The current intensity at different dNTPs  
87 concentration in the presence of 2 nmol/L PDGF-BB. (C) The current intensity at  
88 different dosage of Bst DNA polymerase in the presence of 2 nmol/L PDGF-BB.  
89 Error bars show the standard deviation of three experiments.

90

91 **Table S1** Summary of recent PDGF-BB assays using aptamer as a recognition  
92 molecule

| Approach                  | Linear range          | Detection limit | Reference |
|---------------------------|-----------------------|-----------------|-----------|
| Colorimetric assay        | 15 nmol/L–100 nmol/L  | 6 nmol/L        | R1        |
| Fluorescence assay        | 25ng/mL-10ug/mL       | 0.18 nmol/L     | R2        |
| Luminescence              | 0–50 nmol/L           | 1 nmol/L        | R3        |
| Capillary electrophoresis | 0.5–50 nmol/L         | 50 pmol/L       | R4        |
| Electrochemical Assay     | 84 pmol/L– 8.4 nmol/L | 63 pmol/L       | R5        |

93

94 **Reference**

95

96 R1 C.C. Chang, S. C. Wei, T. H. Wu, C. H. Lee and C. W. Lin, *Biosens.*  
97 *Bioelectron.*, 2003, 42, 119.

98 R2 L. P. Qiu, Z. S. Wu, G. L. Shen and R. Q. Yu, *Anal. Chem.*, 2011, 83, 3050.

99 R3 Y. Jiang, X. Fang and C. Bai, *Anal. Chem.*, 2004, 76, 5230.

100 R4 H. Zhang, X. F. Li and X. C. Le, *Anal. Chem.*, 2009, 8, 7795.

101 R5 Z. S. Wu, H. Zhou, S. B. Zhang, G. L. Shen and R. Q. Yu, *Anal. Chem.*, 2010,  
102 82, 2282.

103
